# Supplementary material
Source: Springer Nature journal article supplement (https://www.springermedizin.de/resource/supplementary/13047_2012_465_MOESM3_ESM.pdf/9663708)

Difference MLEO session 1 and session 2

5  
0  
-5  
-10  
-15

0 5 10 15 20

Average MLEO session 1 and session 2

+1.96 SD  
3.81  
Mean  
-1.39  
-1.96 SD  
-6.59

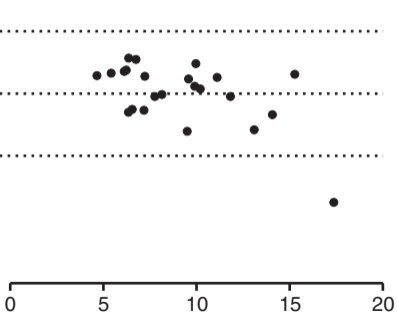

Supplement: MOESM3 [file 9663708]
